# Supplementary material for: Differentiating surface and bulk interactions in nanoplasmonic interferometric sensor arrays
Source: Royal Society of Chemistry journal article supplement (doi:10.1039/c4nr05495d), 2014-11-03
Supplement: c4nr05495d1.pdf [file c4nr05495d1.pdf]

Supplementary materials

## Differentiating surface and bulk interactions in nanoplasmonic interferometric sensor arrays

Beibei Zeng,<sup>\*a</sup> Yongkang Gao,<sup>a</sup> Filbert J. Bartoli,<sup>†a</sup>

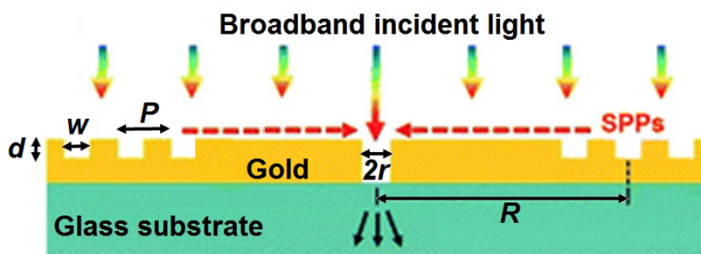

Fig. S1. Side view of the ring-hole nanostructure. The optimized structural parameters: groove periodicity  $P=430\text{nm}$ ,  $R=4.35\mu\text{m}$ ,  $w=210\text{nm}$ ,  $d=45\text{nm}$ , and  $r=300\text{nm}$ .

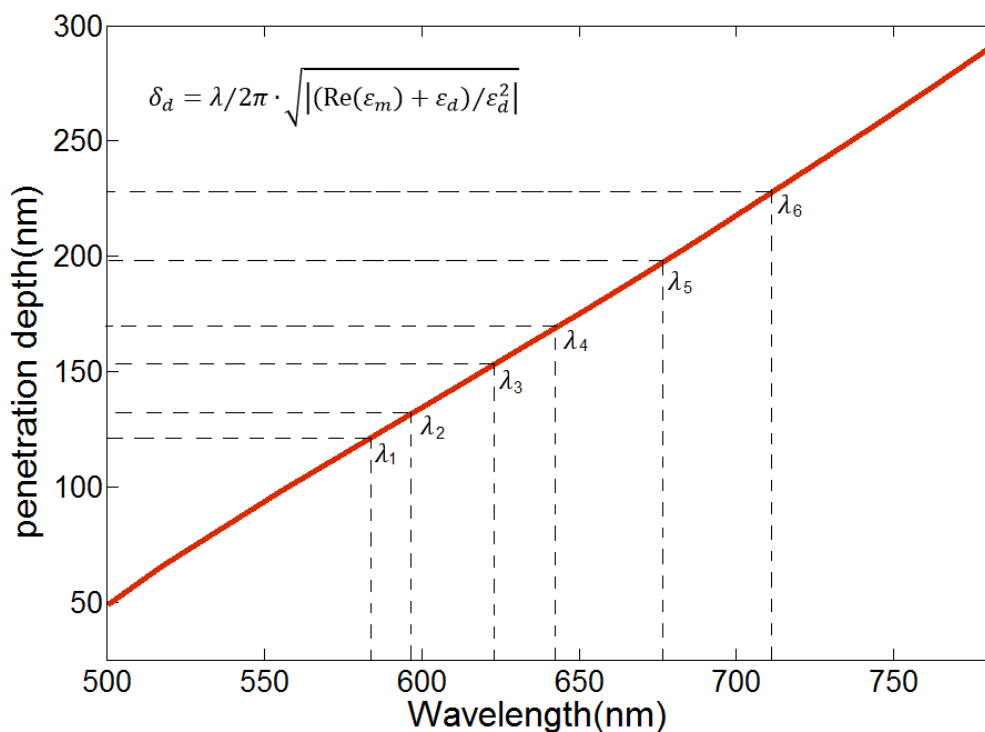

Fig. S2. Theoretical penetration depths  $\delta_d$  of SPPs into the water solution at the Au/water interface as a function of wavelength.  $\lambda_1$  to  $\lambda_6$  represent the wavelengths of multiple interference peaks and valleys.
